# Supplementary material for: Photochromic organic solar cells based on diarylethenes
Source: Royal Society of Chemistry journal article supplement (doi:10.1039/d0ra04508j), 2020-01-01
Supplement: d0ra04508j1.pdf [file d0ra04508j1.pdf]

## Electronic Supplementary Information

### Photochromic organic solar cells based on diarylethenes

Bart W. H. Saes, Martijn M. Wienk, and René A. J. Janssen

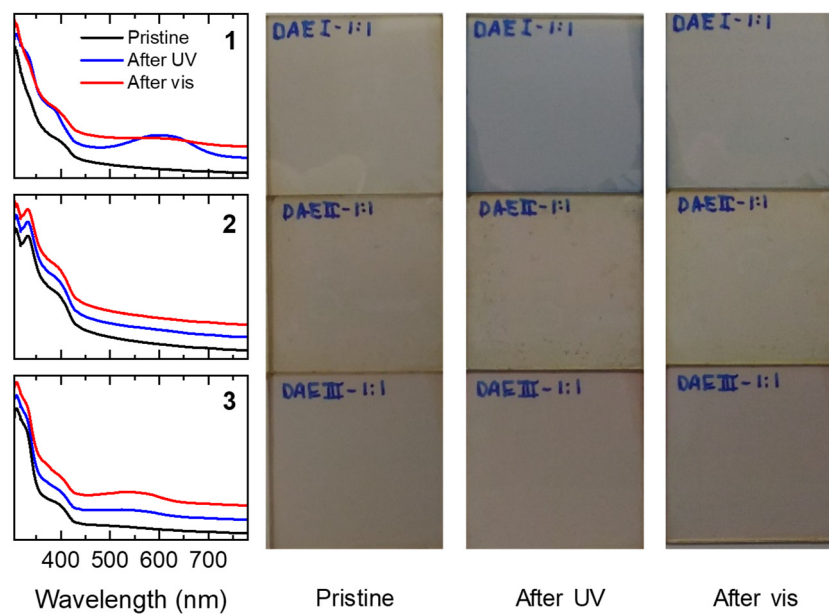

**Fig. S1.** UV-vis absorption spectra and photographs of ternary blends of 1-3, PC<sub>61</sub>BM, and poly-TPD. The ratio DAE/poly-TPD/PC<sub>61</sub>BM weight ratio was 5:1:4. The samples were consecutively measured as pristine samples, after UV illumination, and after illumination with visible light as detailed in the Experimental Section. The spectra UV-vis are offset vertically for clarity.

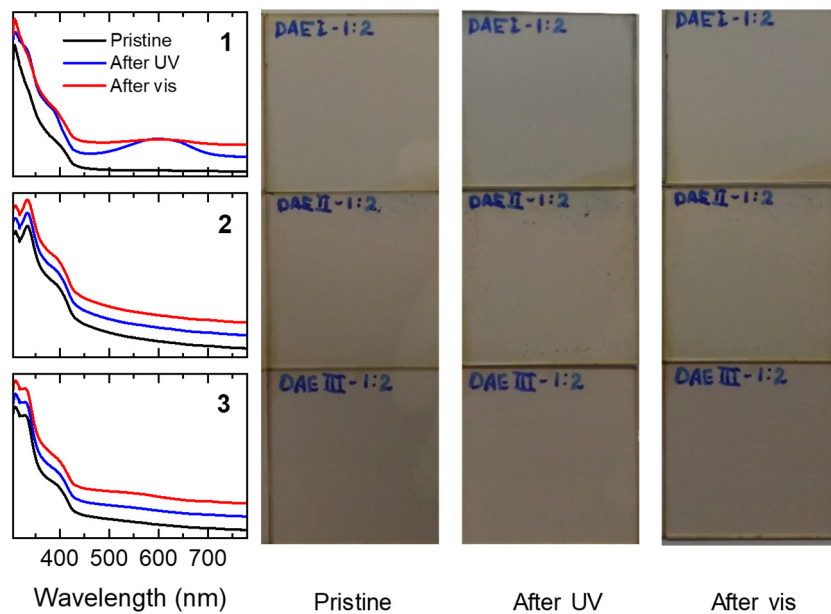

**Fig. S2.** UV-vis absorption spectra and photographs of ternary blends of **1-3**, PC<sub>61</sub>BM, and poly-TPD. The ratio DAE/poly-TPD/PC<sub>61</sub>BM weight ratio was 2.5:1:4. The samples were consecutively measured as pristine samples, after UV illumination, and after illumination with visible light as detailed in the Experimental Section. The spectra UV-vis are offset vertically for clarity.

**1** before UV illumination:  $R_q = 0.70$  nm

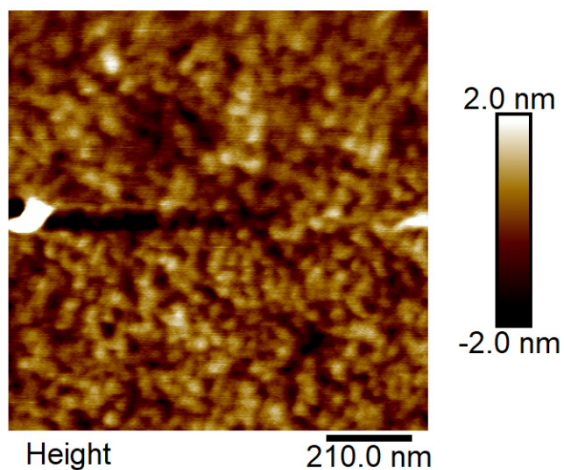

**1** after UV illumination:  $R_q = 0.37$  nm

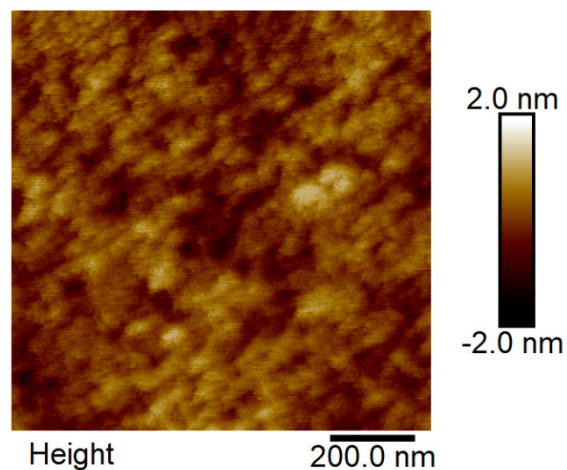

**2** before UV illumination:  $R_q = 0.31$  nm

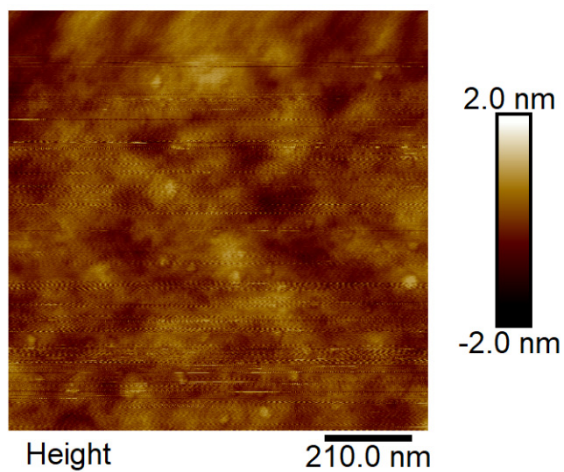

**2** after UV illumination:  $R_q = 0.31$  nm

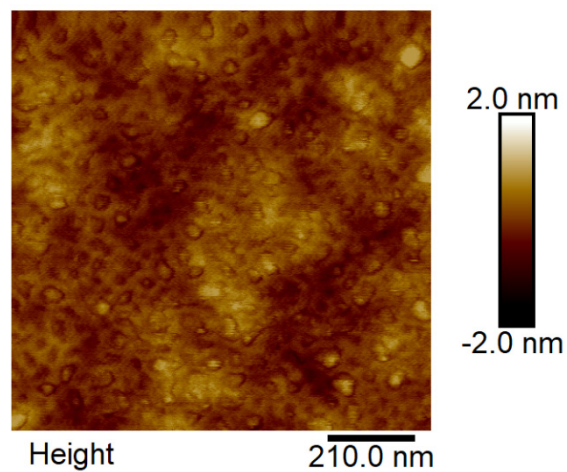

**3** before UV illumination:  $R_q = 0.26$  nm

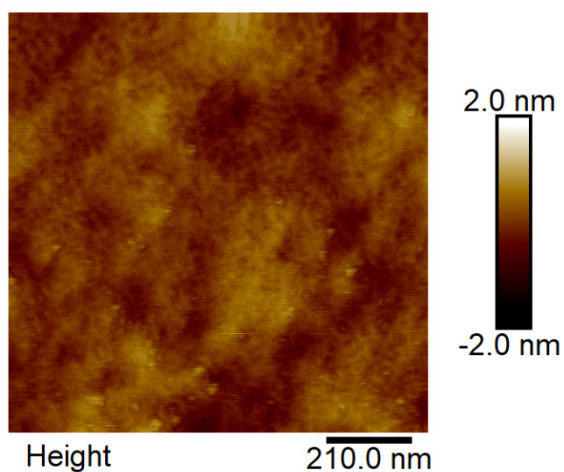

**3** after UV illumination:  $R_q = 0.28$  nm

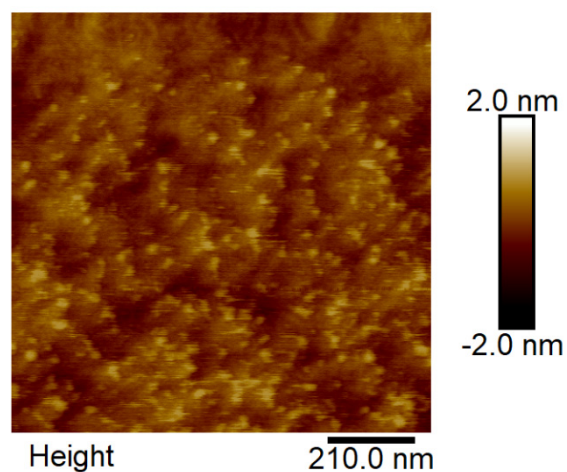

**Fig. S3.** AFM height images of DAE/poly-TPD/PC<sub>61</sub>BM ternary blends recorded for dyes **1-3** before and after UV illumination.  $R_q$  represents the root-mean-square surface roughness.

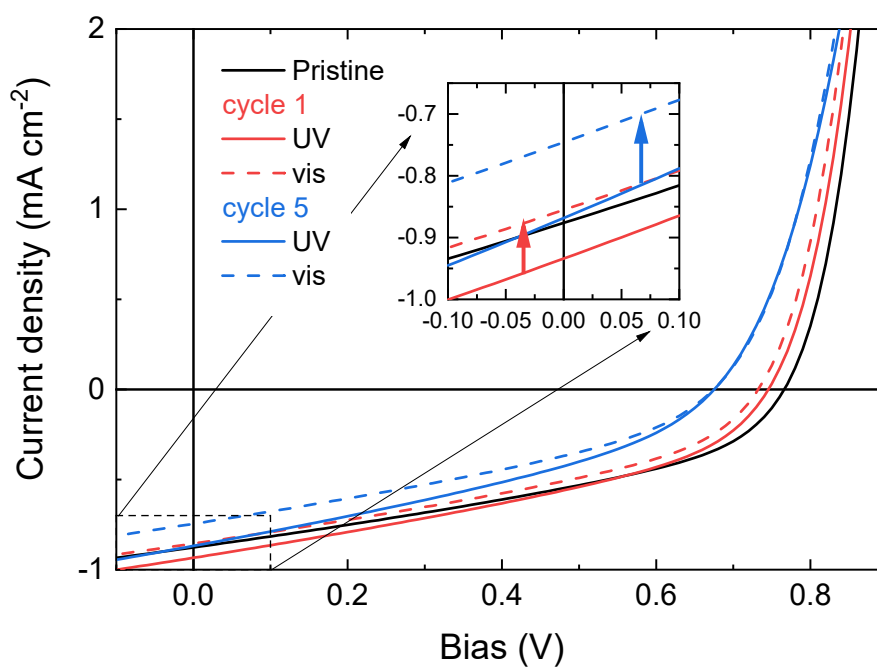

**Fig. S4.** Current density – voltage ( $J$ - $V$ ) characteristics of ternary **1**/poly-TPD/PC<sub>61</sub>BM solar cells, exposed to alternating UV and visible light for periods of 30 min. The experiment shows the stability of switching the device between the open-ring isomer (**1a**) and closed-ring isomer (**1b**). UV illumination switches the cell to the colored ring-closed isomer **1b**, while illumination with visible light switches it back to the open-ring isomer **1a**. Results are shown for the 1<sup>st</sup> and 5<sup>th</sup> cycle. Figure 8 in the main text show the photovoltaic parameters obtained in each cycle.
